# Supplementary material for: How to Improve the Reactive Strength Index among Male Athletes? A Systematic Review with Meta-Analysis
Source: MDPI journal article supplement (doi:10.3390/healthcare10040593), 2022-03-22
Supplement: s1 [file s1]

## SUPPLEMENTARY FILE

### CONTENTS

Supplemental Material S1 Comprehensive search strategy

Supplemental Material S2 Risk of bias assessment using the Revised Cochrane risk-of-bias tool for randomized trials (RoB 2.0) scale

Supplemental Material S3 Risk of bias assessment using the Risk of Bias in Non-randomized Studies - of Interventions (ROBINS-I) tool

Supplemental Material S4 Characteristics of the included studies, interventions, and outcomes

Supplemental Material S5 Meta-analyses of all study designs

Supplemental Material S1. Comprehensive search strategy

ALL (("reactive strength index" OR "reactive-strength index" OR "reactive strength-index" OR "reactive-strength-index" OR "re-active strength" OR "reactive-strength" OR "reactive index" OR "reactive-index" OR "strength index" OR "strength-index" OR "RSI")) AND

("player" OR "players" OR "athlete" OR "athletes" OR "sport" OR "sports" OR "sport participant" OR "sports participant" OR "sports participants" OR "sport participants" OR "modality" OR "modalities")

Supplemental Material S2. Risk of bias assessment using the Revised Cochrane risk-of-bias tool for randomized trials (RoB 2.0) scale. Green means low risk of bias. Orange means some concerns. Red means high risk of bias.

| Author (year)                           | Randomisation Process | Deviations From the Intended Interventions | Missing Outcomes | Measurement of The Outcome | Selection of Reported Results | Overall Risk of Bias |
|-----------------------------------------|-----------------------|--------------------------------------------|------------------|----------------------------|-------------------------------|----------------------|
| Hammami <i>et al</i> 2022 [71]          | Low risk              | Low risk                                   | Low risk         | Low risk                   | Low risk                      | Low risk             |
| Murton <i>et al</i> 2021 [65]           | Low risk              | Low risk                                   | Low risk         | Low risk                   | Low risk                      | Low risk             |
| Guo <i>et al</i> 2021 [66]              | Low risk              | Low risk                                   | Low risk         | Low risk                   | Low risk                      | Low risk             |
| Ramirez-Campillo <i>et al</i> 2020 [61] | Low risk              | Low risk                                   | Low risk         | Low risk                   | Low risk                      | Low risk             |
| Fiorilli <i>et al</i> 2020 [44]         | Low risk              | Low risk                                   | Low risk         | Low risk                   | High risk                     | High risk            |
| Bougezzi <i>et al</i> 2020 [47]         | Low risk              | Low risk                                   | High risk        | Low risk                   | Low risk                      | High risk            |
| Bougezzi <i>et al</i> 2020 [67]         | Low risk              | Low risk                                   | Low risk         | Low risk                   | Low risk                      | Low risk             |
| Orange <i>et al</i> 2019 [58]           | Low risk              | Low risk                                   | Low risk         | Some concerns              | Low risk                      | Some concerns        |
| Jeffreys <i>et al</i> 2019 [60]         | Low risk              | Low risk                                   | Low risk         | Low risk                   | Low risk                      | Low risk             |
| Ramirez-Campillo <i>et al</i> 2019 [45] | Low risk              | Some concerns                              | Low risk         | Low risk                   | High risk                     | High risk            |
| Ramirez-Campillo <i>et al</i> 2019 [46] | Some concerns         | Low risk                                   | Low risk         | Low risk                   | High risk                     | High risk            |
| Sporri <i>et al</i> 2018 [41]           | Low risk              | Low risk                                   | Low risk         | Low risk                   | Low risk                      | Low risk             |
| Ramirez-Campillo <i>et al</i> 2018 [38] | Low risk              | Low risk                                   | Low risk         | Low risk                   | Low risk                      | Low risk             |

|                                         |               |               |           |               |               |               |
|-----------------------------------------|---------------|---------------|-----------|---------------|---------------|---------------|
| Ramirez-Campillo <i>et al</i> 2018 [62] | Low risk      | Low risk      | Low risk  | Low risk      | Low risk      | Low risk      |
| Makhlouf <i>et al</i> 2018 [68]         | Low risk      | Low risk      | Low risk  | Low risk      | Some concerns | Some concerns |
| Douglas <i>et al</i> 2018 [43]          | High risk     | Low risk      | Low risk  | High risk     | High risk     | High risk     |
| Ciacci and Bartolomei 2018 [72]         | Low risk      | Some concerns | Low risk  | Low risk      | Low risk      | Some concerns |
| Negra <i>et al</i> 2017 [70]            | Low risk      | Low risk      | Low risk  | Low risk      | Some concerns | Some concerns |
| Dello Iacono <i>et al</i> 2017 [37]     | Low risk      | Low risk      | Low risk  | Low risk      | Low risk      | Low risk      |
| Chaouachi <i>et al</i> 2017 [69]        | Low risk      | Low risk      | Low risk  | Low risk      | Low risk      | Low risk      |
| Rosas <i>et al</i> 2016 [34]            | Low risk      | Low risk      | Low risk  | Low risk      | Low risk      | Low risk      |
| Hammami <i>et al</i> 2016 [48]          | Low risk      | Low risk      | Low risk  | Low risk      | High risk     | High risk     |
| Ramirez-Campillo <i>et al</i> 2015 [29] | Low risk      | Low risk      | Low risk  | Low risk      | Low risk      | Low risk      |
| Ramirez-Campillo <i>et al</i> 2015 [30] | Some concerns | Some concerns | Low risk  | Low risk      | Low risk      | Some concerns |
| Ramirez-Campillo <i>et al</i> 2015 [31] | Some concerns | Some concerns | Low risk  | Low risk      | Low risk      | Some concerns |
| Ramirez-Campillo <i>et al</i> 2015 [32] | Low risk      | Low risk      | Low risk  | Low risk      | Low risk      | Low risk      |
| Ramirez-Campillo <i>et al</i> 2014 [33] | Some concerns | Some concerns | Low risk  | Low risk      | Low risk      | Some concerns |
| Lockie <i>et al</i> 2012 [49]           | High risk     | High risk     | Low risk  | Low risk      | Low risk      | High risk     |
| Argus <i>et al</i> 2012 [35]            | High risk     | Low risk      | Low risk  | Low risk      | Some concerns | High risk     |
| Byrne <i>et al</i> 2010 [50]            | High risk     | High risk     | Low risk  | Low risk      | Low risk      | High risk     |
| Salonikidis and Zafeiridis 2008 [51]    | High risk     | Some concerns | Low risk  | Low risk      | Low risk      | High risk     |
| Spinks <i>et al</i> 2007 [52]           | High risk     | Some concerns | Low risk  | Low risk      | Low risk      | High risk     |
| Young <i>et al</i> 1999 [53]            | Some concerns | Some concerns | High risk | Some concerns | Low risk      | High risk     |

Supplemental Material S3. Risk of bias assessment using the Risk of Bias in Non-randomized Studies - of Interventions (ROBINS-I) tool

| Author (year)                   | Confounding | Selection Bias | Classification Of Interventions | Reporting Bias | Deviations from Interventions | Missing Data | Measuring Outcomes | Overall Risk of Bias |
|---------------------------------|-------------|----------------|---------------------------------|----------------|-------------------------------|--------------|--------------------|----------------------|
| Dobbs <i>et al</i> 2020 [55]    | Critical    | Moderate       | Low                             | Low            | Low                           | Low          | Low                | Serious              |
| Chaabene <i>et al</i> 2019 [57] | Serious     | Serious        | Moderate                        | Low            | Low                           | Serious      | Serious            | Serious              |
| Li <i>et al</i> 2019 [56]       | Serious     | Serious        | Serious                         | Low            | Low                           | Low          | Low                | Serious              |
| Wee <i>et al</i> 2019 [42]      | Critical    | Critical       | Low                             | Serious        | Low                           | Low          | Critical           | Serious              |
| Keiner <i>et al</i> 2018 [36]   | Critical    | Serious        | Moderate                        | Low            | Serious                       | Moderate     | Moderate           | Serious              |
| Beattie <i>et al</i> 2017 [54]  | Serious     | Critical       | Low                             | Low            | Critical                      | Critical     | Low                | Critical             |

## Supplemental Material S4. Characteristics of the included studies, interventions, and outcomes

Table S1. Randomized studies.

| Author, year                            | N                               | Age                                               | Sport      | Intervention                                                                                                                                                                                                                                  | Control                      | Measurement Equipment                                       | Methodology                                                          | Results                                                                                        |
|-----------------------------------------|---------------------------------|---------------------------------------------------|------------|-----------------------------------------------------------------------------------------------------------------------------------------------------------------------------------------------------------------------------------------------|------------------------------|-------------------------------------------------------------|----------------------------------------------------------------------|------------------------------------------------------------------------------------------------|
| Hammami <i>et al</i> 2022 [71]          | 27<br>G1: 14<br>C: 13           | G1: 14.86 ± 0.52<br>C: 14.74 ± 0.36               | Volleyball | Duration: 8 weeks<br>Type: Resistance elastic band training<br>Frequency: 2x/week                                                                                                                                                             | Maintained training routines | Ergojump (Globus, Codogne, Italy)                           | Contact mat (Vertical Hops: jump height/contact time; hands on hips) | G1: 1.35 ± 0.15 ; 1.57 ± 0.16<br>C: 1.37 ± 0.26 ; 1.39 ± 0.42                                  |
| Murton <i>et al</i> 2021 [65]           | 16<br>G1: 8<br>G2: 8            | ALL: 18.0 ± 1.0                                   | Rugby      | Intervention 1<br>Duration: 4 weeks<br>Type: Flywheel Eccentric Overload Training<br>Frequency: 3x/week<br>Intervention 2<br>Duration: 4 weeks<br>Type: Resistance Training<br>Frequency: 3x/week                                             | N/A                          | ForceDecks (Vald Performance Pty Ltd., Brisbane, Australia) | Force Plate (DJ40: jump height / contact time; hands on hips)        | G1: 1.94 ± 0.40 ; 2.07 ± 0.42<br>G2: 1.97 ± 0.35 ; 2.22 ± 0.47                                 |
| Guo <i>et al</i> 2021 [66]              | 16<br>G1: 8<br>G2: 8            | G1: 20.5 ± 1.1<br>G2: 19.1 ± 2.2                  | Badminton  | Intervention 1<br>Duration: 6 weeks<br>Type: Balance plyometric training<br>Frequency: 3x/week<br>Intervention 2<br>Duration: 6 weeks<br>Type: Plyometric training<br>Frequency: 3x/week                                                      | N/A                          | Kistler (Quattro Jump, Winterthur, Switzerland)             | Force Plate (DJ30: jump height / contact time; hands on hips)        | G1: 1.27 ± 0.14 ; 1.50 ± 0.12<br>G2: 1.22 ± 0.12 ; 1.35 ± 0.15                                 |
| Ramirez-Campillo <i>et al</i> 2020 [61] | 38<br>G1: 12<br>G2: 14<br>C: 12 | G1: 16.9 ± 0.7<br>G2: 17.1 ± 0.3<br>C: 17.1 ± 0.5 | Soccer     | Intervention 1<br>Duration: 7 weeks<br>Type: Plyometric training before regular soccer practice<br>Frequency: 2x/week<br>Intervention 2<br>Duration: 7 weeks<br>Type: Plyometric training after regular soccer practice<br>Frequency: 2x/week | Maintained training routines | Ergojump (Globus, Codogne, Italy)                           | Contact mat (DJ20: jump height / contact time; hands on hips)        | G1: 1.77 ± 0.20 ; 2.11 ± 0.22<br>G2: 1.76 ± 0.32 ; 1.85 ± 0.31<br>C: 1.74 ± 0.28 ; 1.76 ± 0.31 |

|                                         |                        |                                      |        |                                                                                                                                                                                                              |                              |                                      |                                                                                                 |                                                                |
|-----------------------------------------|------------------------|--------------------------------------|--------|--------------------------------------------------------------------------------------------------------------------------------------------------------------------------------------------------------------|------------------------------|--------------------------------------|-------------------------------------------------------------------------------------------------|----------------------------------------------------------------|
| Fiorilli <i>et al</i> 2020 [44]         | 34<br>G1: 16<br>G2: 18 | G1: 13.36 ± 0.80<br>G2: 13.21 ± 1.21 | Soccer | Intervention 1<br>Duration: 6 weeks<br>Type: Plyometric training<br>Frequency: 2x/week<br>Intervention 2<br>Duration: 6 weeks<br>Type: Flywheel Eccentric Overload Training<br>Frequency: 2x/week            | N/A                          | Optojump (Microgate, Bolzano, Italy) | Photoelectric system (7 Hop Test: average jump height / average ground contact time; free arms) | G1: 0.70 ± 0.30 ; 0.76 ± 0.19<br>G2: 0.84 ± 0.18 ; 0.83 ± 0.18 |
| Bouguazzi <i>et al</i> 2020 [47]        | 30<br>G1: 15<br>G2: 15 | G1: 11.32 ± 0.27<br>G2: 12.27 ± 0.33 | Soccer | Intervention 1<br>Duration: 8 weeks<br>Type: Plyometric training<br>Frequency: 1x/week<br>Intervention 2<br>Duration: 8 weeks<br>Type: Plyometric training<br>Frequency: 2x/week                             | N/A                          | Optojump (Microgate, Bolzano, Italy) | Photoelectric system (5 Hop Test: average jump height / average ground contact time; free arms) | G1: 0.72 ± 0.29 ; 1.15 ± 0.33<br>G2: 0.79 ± 0.21 ; 1.10 ± 0.27 |
| Bouguazzi <i>et al</i> 2020 [67]        | 26<br>G1: 13<br>G2: 13 | G1: 11.2 ± 0.5<br>G2: 11.3 ± 0.6     | Soccer | Intervention 1<br>Duration: 8 weeks<br>Type: SSC-based using countermovement jump<br>Frequency: 2x week<br>Intervention 2<br>Duration: 8 weeks<br>Type: Non-SSC-based using squat jump<br>Frequency: 2x week | N/A                          | Optojump (Microgate, Bolzano, Italy) | Photoelectric system (Vertical Hops: jump height / contact time; hands on hips)                 | G1: 0.69 ± 0.22 ; 0.97 ± 0.26<br>G2: 0.68 ± 0.25 ; 0.67 ± 0.26 |
| Orange <i>et al</i> 2019 [58]           | 27<br>G1: 12<br>G2: 15 | ALL: 17.0 ± 1.0                      | Rugby  | Intervention 1<br>Duration: 7 weeks<br>Type: Velocity-based training<br>Frequency: 2x week<br>Intervention 2<br>Duration: 7 weeks<br>Type: Percentage-based training<br>Frequency: 2x week                   | N/A                          | Optojump (Microgate, Bolzano, Italy) | Photoelectric system (DJ30: jump height / contact time; hands on hips)                          | G1: 1.34 ± 0.36 ; 1.35 ± 0.31<br>G2: 1.16 ± 0.18 ; 1.28 ± 0.20 |
| Ramirez-Campillo <i>et al</i> 2019 [45] | 39<br>G1: 19<br>C: 20  | G1: 13.2 ± 1.8<br>C: 13.5 ± 1.9      | Soccer | Duration: 7 weeks<br>Type: DJ training<br>Frequency: 2x week                                                                                                                                                 | Maintained training routines | Ergojump (Globus, Codogne, Italy)    | Contact mat (DJ20: jump height /                                                                | G1: 1.07 ± 0.43 ; 1.24 ± 0.38<br>C: 1.09 ± 0.41 ; 1.03 ± 0.38  |

|                                                |                                        |                                                                                      |             |                                                                                                                                          |                                 |                                                   |                                                                              | contact time;<br>hands on<br>hips)                                                                                                                       |
|------------------------------------------------|----------------------------------------|--------------------------------------------------------------------------------------|-------------|------------------------------------------------------------------------------------------------------------------------------------------|---------------------------------|---------------------------------------------------|------------------------------------------------------------------------------|----------------------------------------------------------------------------------------------------------------------------------------------------------|
| Ramirez-<br>Campillo <i>et al</i><br>2019 [46] | 26<br>G1: 7<br>G2: 7<br>G3: 6<br>G4: 6 | G1: $10.9 \pm 0.8$<br>G2: $11.2 \pm 1.4$<br>G3: $15.0 \pm 0.9$<br>G4: $15.6 \pm 1.3$ | Soccer      | Intervention 1<br>Duration: 24 weeks<br>Type: Plyometric training with<br>30 s inter-set intervals (pre-<br>PHV)<br>Frequency: 2x week   | N/A                             | Ergojump (Globus,<br>Codogne, Italy)              | Contact mat<br>(DJ20: jump<br>height /<br>contact time;<br>hands on<br>hips) | G1: $0.87 \pm 0.5$ ; $1.13 \pm 0.4$<br>G2: $0.98 \pm 0.2$ ; $1.32 \pm 0.2$<br>G3: $1.28 \pm 0.7$ ; $1.80 \pm 0.7$<br>G4: $1.22 \pm 0.5$ ; $1.65 \pm 0.4$ |
|                                                |                                        |                                                                                      |             | Intervention 2<br>Duration: 24 weeks<br>Type: Plyometric training with<br>120 s inter-set intervals (pre-<br>PHV)<br>Frequency: 2x week  |                                 |                                                   |                                                                              |                                                                                                                                                          |
|                                                |                                        |                                                                                      |             | Intervention 3<br>Duration: 24 weeks<br>Type: Plyometric training with<br>30 s inter-set intervals (post-<br>PHV)<br>Frequency: 2x week  |                                 |                                                   |                                                                              |                                                                                                                                                          |
|                                                |                                        |                                                                                      |             | Intervention 4<br>Duration: 24 weeks<br>Type: Plyometric training with<br>120 s inter-set intervals (post-<br>PHV)<br>Frequency: 2x week |                                 |                                                   |                                                                              |                                                                                                                                                          |
| Jeffreys <i>et al</i><br>2019 [60]             | 29<br>G1: 10<br>G2: 9<br>C: 10         | ALL: $20.3 \pm 1.6$                                                                  | Rugby       | Intervention 1<br>Duration: 6 weeks<br>Type: Low Volume Plyometric<br>Training<br>Frequency: 2x/week                                     | Maintained<br>training routines | Kistler (Quattro Jump,<br>Winterhur, Switzerland) | Force Plate<br>(DJ45: jump<br>height /<br>contact time;<br>hands on<br>hips) | G1: $1.33 \pm 0.40$ ; $1.45 \pm 0.38$<br>G2: $1.26 \pm 0.36$ ; $1.36 \pm 0.38$<br>C: $0.91 \pm 0.24$ ; $0.85 \pm 0.22$                                   |
|                                                |                                        |                                                                                      |             | Intervention 2<br>Duration: 6 weeks<br>Type: High Volume Plyometric<br>Training<br>Frequency: 2x/week                                    |                                 |                                                   |                                                                              |                                                                                                                                                          |
| Sporri <i>et al</i> 2018<br>[41]               | 21<br>G1: 11<br>C: 9                   | ALL: $22.2 \pm 2.5$                                                                  | Team Sports | Duration: 8 weeks<br>Type: Aqua-based plyometric                                                                                         | Maintained<br>training routines | Onspot (Wollongong,<br>Australia)                 | Force plate<br>(DJ50: jump<br>height /                                       | G1: $9.90 \pm 4.00$ ; $11.4 \pm 4.30$<br>C: $13.3 \pm 4.00$ ; $12.2 \pm 4.50$                                                                            |

|                                                |                                                             |                                                                                                          | training<br>Frequency: 3x week |                                                                                                                                                                                                                                                           |                                                                                                                           |                                            | contact time;<br>hands on<br>hips)                                                                                                                                                                                                                                                       |
|------------------------------------------------|-------------------------------------------------------------|----------------------------------------------------------------------------------------------------------|--------------------------------|-----------------------------------------------------------------------------------------------------------------------------------------------------------------------------------------------------------------------------------------------------------|---------------------------------------------------------------------------------------------------------------------------|--------------------------------------------|------------------------------------------------------------------------------------------------------------------------------------------------------------------------------------------------------------------------------------------------------------------------------------------|
| Ciacchi and<br>Bartolomei 2018<br>[72]         | 58<br>G1: 10<br>G2: 10<br>G3: 9<br>G4: 12<br>G5: 8<br>G6: 9 | G1: 24.3 ± 7.0<br>G2: 17.5 ± 0.5<br>G3: 15.7 ± 0.5<br>G4: 20.1 ± 1.6<br>G5: 17.4 ± 0.5<br>G6: 14.8 ± 0.4 | Basketball                     | Interventions 1, 2 and 3<br>Duration: 12 weeks<br>Type: Hang Clean Training<br>Frequency: 2x week<br>Interventions 4, 5 and 6<br>Duration: 12 weeks Type: Half<br>Squat Training<br>Frequency: 2x week                                                    | N/A                                                                                                                       | Ergotester PRO<br>(Globus, Treviso, Italy) | Contact mat<br>(CMJ:<br>contact time /<br>time to<br>takeoff;<br>hands on<br>hips)<br>G1: 2.58 ± 0.44 ; 2.67 ± 0.56<br>G2: 2.40 ± 0.37 ; 2.60 ± 0.47<br>G3: 2.62 ± 0.43 ; 2.86 ± 0.36<br>G4: 2.70 ± 0.30 ; 2.72 ± 0.36<br>G5: 2.52 ± 0.32 ; 2.69 ± 0.46<br>G6: 2.01 ± 0.39 ; 2.21 ± 0.25 |
| Ramirez-<br>Campillo <i>et al</i><br>2018 [38] | 73<br>G1: 25<br>G2: 24<br>C: 24                             | G1: 13.9 ± 1.9<br>G2: 13.1 ± 1.7<br>C: 13.7 ± 1.6                                                        | Soccer                         | Intervention 1<br>Duration: 7 weeks<br>Type: Plyometric training from<br>a fixed box height of 30 cm<br>Frequency: 2x/week<br>Intervention 2<br>Duration: 7 weeks<br>Type: Plyometric training from<br>an individualized box height<br>Frequency: 2x/week | Maintained<br>training routines                                                                                           | Ergojump (Globus,<br>Codogne, Italy)       | Contact mat<br>(DJ20: flight<br>time / contact<br>time; hands<br>on hips)<br>G1: 1.1 ± 0.5 ; 1.3 ± 0.5<br>G2: 1.1 ± 0.5 ; 1.5 ± 0.5<br>C: 1.1 ± 0.5 ; 1.2 ± 0.4                                                                                                                          |
| Douglas <i>et al</i><br>2018 [43]              | 14<br>G1: 7<br>C: 7                                         | ALL: 19.4 ±<br>0.8                                                                                       | Rugby                          | Duration: 12 weeks<br>Type: Accentuated eccentric<br>resistance training<br>Frequency: 2x/week strength +<br>1x/week power                                                                                                                                | Duration: 12<br>weeks<br>Type: Traditional<br>resistance<br>training<br>Frequency:<br>2x/week strength<br>+ 1x/week power | AMTI (Watertown,<br>MA, USA)               | Force plate<br>(DJ50: flight<br>time / contact<br>time; hands<br>on hips)<br>G1: 2.29 ± 0.32 ; 2.41 ± 0.45<br>C: 1.94 ± 0.31 ; 1.97 ± 0.56                                                                                                                                               |
| Ramirez-<br>Campillo <i>et al</i><br>2018 [62] | 76<br>G1: 38<br>C: 38                                       | 10-16                                                                                                    | Soccer                         | Duration: 7 weeks<br>Type: Plyometric training<br>Frequency: 2x/week                                                                                                                                                                                      | Maintained<br>training routines                                                                                           | Ergojump (Globus,<br>Codogne, Italy)       | Contact mat<br>(DJ20: jump<br>height /<br>contact time;<br>hands on<br>hips)<br>G1: 23.3% ± 17.3%<br>C: -1.7% ± 13.2%                                                                                                                                                                    |
| Makhlouf <i>et al</i><br>2018 [68]             | 57<br>G1: 21<br>G2: 20<br>C: 16                             | G1: 11.1 ± 0.8<br>G2: 11.3 ± 0.9<br>C: 11.0 ± 0.8                                                        | Soccer                         | Intervention 1<br>Duration: 8 weeks<br>Type: Balance-Plyometric<br>Training<br>Frequency: 2x/week                                                                                                                                                         | Maintained<br>training routines                                                                                           | Ergojump (Globus,<br>Codogne, Italy)       | Contact mat<br>(Vertical<br>Hops: flight<br>time / contact<br>time)<br>G1: 0.8 ± 0.3 ; 1.1 ± 0.2<br>G2: 0.8 ± 0.2 ; 1.1 ± 0.3<br>C: 0.8 ± 0.3 ; 0.9 ± 0.3                                                                                                                                |

|                                     |                        |                                    |               |                                                                                                                                                                                                                                                                                          |     |                                                |                                                                                 |                                                              |
|-------------------------------------|------------------------|------------------------------------|---------------|------------------------------------------------------------------------------------------------------------------------------------------------------------------------------------------------------------------------------------------------------------------------------------------|-----|------------------------------------------------|---------------------------------------------------------------------------------|--------------------------------------------------------------|
|                                     |                        |                                    |               | Intervention 2<br>Duration: 8 weeks<br>Type: Agility-Plyometric Training<br>Frequency: 2x/week                                                                                                                                                                                           |     |                                                | time; hands on hips)                                                            |                                                              |
| Chaouachi <i>et al</i> 2017 [69]    | 26<br>G1: 13<br>G2: 13 | G1: 13.9 ± 0.27<br>G2: 13.8 ± 0.32 | Soccer        | Intervention 1<br>Duration: 8 weeks<br>Type: Alternated a series of paired individual balance and plyometric exercises<br>Frequency: 2x week<br>Intervention 2<br>Duration: 8 weeks<br>Type: A block of balance exercises prior to a block of plyometric exercises<br>Frequency: 2x week | N/A | Ergojump (Globus, Codogne, Italy)              | Contact mat (Triple Hop Test: jump height / contact time; hands on hips)        | G1: 0.8 ± 0.3 ; 1.21 ± 0.19<br>G2: 0.79 ± 0.25 ; 1.31 ± 0.27 |
| Dello Iacono <i>et al</i> 2017 [37] | 18<br>G1: 9<br>G2: 9   | ALL: 23.4 ± 4.6                    | Team handball | Intervention 1<br>Duration: 10 weeks<br>Type: Vertical-oriented drop jump training<br>Frequency: 2x week<br>Intervention 2<br>Duration: 10 weeks<br>Type: Horizontal-oriented drop jump training<br>Frequency: 2x week                                                                   | N/A | Kistler (Quattro Jump, Winterhur, Switzerland) | Force Plate (CMJ: jump height / contact time; hands on hips)                    | G1: 0.60 ± 0.05 ; 7.2 %<br>G2: 0.59 ± 0.06 ; 2.1 %           |
| Negra <i>et al</i> 2017 [70]        | 33<br>G1: 17<br>G2: 16 | G1: 12.1 ± 0.5<br>G2: 12.2 ± 0.6   | Soccer        | Intervention 1<br>Duration: 8 weeks<br>Type: Plyometric training on stable surfaces<br>Frequency: 2x/week<br>Intervention 2<br>Duration: 8 weeks<br>Type: Plyometric training on stable and unstable surfaces<br>Frequency: 2x/week                                                      | N/A | Optojump (Microgate, Bolzano, Italy)           | Photoelectric system (Vertical Hops: jump height / contact time; hands on hips) | G1: 1.1 ± 0.3 ; 1.3 ± 0.1<br>G2: 1.5 ± 0.3 ; 1.1 ± 0.1       |
| Hammami <i>et al</i> 2016 [48]      | 24<br>G1: 12<br>G2: 12 | G1: 12.7 ± 0.3<br>G2: 12.5 ± 0.3   | Soccer        | Intervention 1<br>Duration: 8 weeks<br>Type: 4 weeks of balance                                                                                                                                                                                                                          | N/A | Ergojump (Globus, Codogne, Italy)              | Force Plate (Vertical Hops: jump                                                | G1: 1.1 ± 0.1 ; 1.4 ± 0.3<br>G2: 0.89 ± 0.15 ; 0.94 ± 0.07   |

|                                         |                                           |                                                                     |        |                                                                                                                                                                                                                                                                              |                              |                                   |                                                               |                                                                                                                                     |
|-----------------------------------------|-------------------------------------------|---------------------------------------------------------------------|--------|------------------------------------------------------------------------------------------------------------------------------------------------------------------------------------------------------------------------------------------------------------------------------|------------------------------|-----------------------------------|---------------------------------------------------------------|-------------------------------------------------------------------------------------------------------------------------------------|
|                                         |                                           |                                                                     |        | training first followed by 4 weeks of plyometric training<br>Frequency: 2x week<br>Intervention 2<br>Duration: 8 weeks<br>Type: 4 weeks of plyometric training first followed by 4 weeks of balance training<br>Frequency: 2x week                                           |                              |                                   | height / contact time; hands on hips)                         |                                                                                                                                     |
| Rosas <i>et al</i> 2016 [34]            | 63<br>G1: 21<br>G2: 21<br>C: 21           | G1: 12.3 ± 2.3<br>G2: 12.1 ± 2.1<br>C: 12.0 ± 2.2                   | Soccer | Intervention 1<br>Duration: 6 weeks<br>Type: Plyometric training<br>Frequency: 2x week<br>Intervention 2<br>Duration: 6 weeks<br>Type: Hand-held loaded plyometric training<br>Frequency: 2x week                                                                            | Maintained training routines | Ergojump (Globus, Codogne, Italy) | Contact mat (DJ20: jump height / contact time; hands on hips) | G1: 1.05 ± 0.4 ; 1.14 ± 0.4*<br>G2: 0.95 ± 0.5 ; 1.10 ± 0.5*<br>C: 1.19 ± 0.4 ; 1.21 ± 0.4*                                         |
| Ramirez-Campillo <i>et al</i> 2015 [29] | 166<br>G1: 54<br>G2: 57<br>C: 55          | G1: 14.2 ± 2.2<br>G2: 14.1 ± 2.2<br>C: 14.0 ± 2.3                   | Soccer | Intervention 1<br>Duration: 6 weeks<br>Type: Plyometric training with 24h of rest between sessions<br>Frequency: 2x week<br>Intervention 2<br>Duration: 6 weeks<br>Type: Plyometric training with 48h of rest between sessions<br>Frequency: 2x week                         | Maintained training routines | Ergojump (Globus, Codogne, Italy) | Contact mat (DJ20: jump height / contact time; hands on hips) | G1: 1.32 ± 0.40 ; 1.46 ± 0.40*<br>G2: 1.37 ± 0.39 ; 1.51 ± 0.37*<br>C: 1.31 ± 0.42 ; 1.32 ± 0.41*                                   |
| Ramirez-Campillo <i>et al</i> 2015 [30] | 40<br>G1: 10<br>G2: 10<br>G3: 10<br>C: 10 | G1: 11.6 ± 1.4<br>G2: 11.4 ± 1.9<br>G3: 11.2 ± 2.3<br>C: 11.4 ± 2.4 | Soccer | Intervention 1<br>Duration: 6 weeks<br>Type: Vertical plyometric<br>Frequency: 2x week<br>Intervention 2<br>Duration: 6 weeks<br>Type: Horizontal plyometric<br>Frequency: 2x week<br>Intervention 3<br>Duration: 6 weeks<br>Type: Combined plyometric<br>Frequency: 2x week | Maintained training routines | Ergojump (Globus, Codogne, Italy) | Contact mat (DJ20: jump height / contact time; hands on hips) | G1: 1.26 ± 0.20 ; 1.45 ± 0.20*<br>G2: 1.32 ± 0.36 ; 1.47 ± 0.32*<br>G3: 1.17 ± 0.41 ; 1.38 ± 0.49*<br>C: 1.42 ± 0.41 ; 1.46 ± 0.39* |



|                                         |                                           |                                                                                     |              |                                                                                                                                                                                                                                                                                                                        |                              |                                   |                                                               |                                                                                                                                                                  |
|-----------------------------------------|-------------------------------------------|-------------------------------------------------------------------------------------|--------------|------------------------------------------------------------------------------------------------------------------------------------------------------------------------------------------------------------------------------------------------------------------------------------------------------------------------|------------------------------|-----------------------------------|---------------------------------------------------------------|------------------------------------------------------------------------------------------------------------------------------------------------------------------|
| Ramirez-Campillo <i>et al</i> 2015 [31] | 54<br>G1: 12<br>G2: 16<br>G3: 12<br>C: 14 | G1: $11.0 \pm 2.0$<br>G2: $11.6 \pm 1.7$<br>G3: $11.6 \pm 2.7$<br>C: $11.2 \pm 2.4$ | Soccer       | Intervention 1<br>Duration: 6 weeks<br>Type: Bilateral plyometric training<br>Frequency: 2x week<br>Intervention 2<br>Duration: 6 weeks<br>Type: Unilateral plyometric training<br>Frequency: 2x week<br>Intervention 3<br>Duration: 6 weeks<br>Type: Bilateral + unilateral plyometric training<br>Frequency: 2x week | Maintained training routines | Ergojump (Globus, Codogne, Italy) | Contact mat (DJ20: jump height / contact time; hands on hips) | G1: $1.3 \pm 0.5$ ; $1.6 \pm 0.4^*$<br>G2: $1.2 \pm 0.3$ ; $1.3 \pm 0.3^*$<br>G3: $1.2 \pm 0.5$ ; $1.4 \pm 0.5^*$<br>C: $1.4 \pm 0.4$ ; $1.4 \pm 0.4^*$          |
| Ramirez-Campillo <i>et al</i> 2015 [32] | 24<br>G1: 8<br>G2: 8<br>C: 8              | G1: $12.8 \pm 2.8$<br>G2: $13.0 \pm 2.1$<br>C: $13.0 \pm 1.9$                       | Soccer       | Intervention 1<br>Duration: 6 weeks<br>Type: Plyometric with progressive increase in volume<br>Frequency: 2x week<br>Intervention 2<br>Duration: 6 weeks<br>Type: Plyometric without progressive increase in volume<br>Frequency: 2x week                                                                              | Maintained training routines | Ergojump (Globus, Codogne, Italy) | Contact mat (DJ20: jump height / contact time; hands on hips) | G1: $0.072 \pm 0.034$ ; $0.092 \pm 0.022^*$<br>G2: $0.062 \pm 0.022$ ; $0.076 \pm 0.038^*$<br>C: $0.080 \pm 0.029$ ; $0.084 \pm 0.048^*$                         |
| Ramirez-Campillo <i>et al</i> 2014 [33] | 76<br>G1: 38<br>C: 38                     | G1: $13.2 \pm 1.8$<br>C: $13.2 \pm 1.8$                                             | Soccer       | Duration: 7 weeks<br>Type: Plyometric training<br>Frequency: 2x week                                                                                                                                                                                                                                                   | Maintained training routines | Ergojump (Globus, Codogne, Italy) | Contact mat (DJ20: jump height / contact time; hands on hips) | G1: $1.04 \pm 0.40$ ; $1.23 \pm 0.35^*$<br>C: $1.01 \pm 0.38$ ; $0.98 \pm 0.35^*$                                                                                |
| Lockie <i>et al</i> 2012 [49]           | 35<br>G1: 9<br>G2: 8<br>G3: 9<br>G4: 9    | ALL: $23.1 \pm 4.2$                                                                 | Field sports | Intervention 1<br>Duration: 6 weeks<br>Type: Free sprint training<br>Frequency: 2x week<br>Intervention 2<br>Duration: 6 weeks<br>Type: Weight training<br>Frequency: 2x week<br>Intervention 3                                                                                                                        | N/A                          | Onspot (Wollongong, Australia)    | Contact mat (DJ40: jump height / contact time; hands on hips) | G1: $1.07 \pm 0.38$ ; $1.27 \pm 0.35$<br>G2: $1.24 \pm 0.21$ ; $1.39 \pm 0.31$<br>G3: $1.31 \pm 0.28$ ; $1.44 \pm 0.22$<br>G4: $1.16 \pm 0.21$ ; $1.31 \pm 0.26$ |

|                                      |  |                                           |                                                   |                                                                                                                                                                                                                                                  |                                                                                                                                                                                                                      |     |                                                        |                                                               |                                                                                                                                                                                                        |
|--------------------------------------|--|-------------------------------------------|---------------------------------------------------|--------------------------------------------------------------------------------------------------------------------------------------------------------------------------------------------------------------------------------------------------|----------------------------------------------------------------------------------------------------------------------------------------------------------------------------------------------------------------------|-----|--------------------------------------------------------|---------------------------------------------------------------|--------------------------------------------------------------------------------------------------------------------------------------------------------------------------------------------------------|
|                                      |  |                                           |                                                   | Duration: 6 weeks<br>Type: Plyometric training<br>Frequency: 2x week<br>Intervention 4<br>Duration: 6 weeks<br>Type: Resisted sprint training<br>Frequency: 2x week                                                                              |                                                                                                                                                                                                                      |     |                                                        |                                                               |                                                                                                                                                                                                        |
| Argus <i>et al</i> 2012 [35]         |  |                                           |                                                   | Intervention 1<br>Duration: 4 weeks<br>Type: High volume-load (strength-power) resistance training<br>Frequency: 2x week<br>Intervention 2<br>Duration: 4 weeks<br>Type: Low volume-load (speed-power) resistance training<br>Frequency: 2x week |                                                                                                                                                                                                                      | N/A | 400 Series Performance (Fitness Technology, Australia) | Force plate (DJ30: jump height / contact time; hands on hips) | G1: 1.83 ± 0.27 ; 0.8 %<br>G2: 1.86 ± 0.30 ; 3.4 %                                                                                                                                                     |
| Byrne <i>et al</i> 2010 [50]         |  | 19<br>G1: 6<br>G2: 6<br>C: 7              | G1: 23.8 ± 7.6<br>G2: 20.8 ± 1.9<br>C: 18.7 ± 7.6 | Basketball, rugby, hurling, Gaelic football and soccer                                                                                                                                                                                           | Intervention 1<br>Duration: 8 weeks<br>Type: Maximum jump height training method<br>Frequency: 2x week<br>Intervention 2<br>Duration: 8 weeks<br>Type: Reactive strength index training method<br>Frequency: 2x week |     | Maintained training routines                           | Power timer clock (Newtest, Oulu, Finland)                    | Force plate (3 Bounce<br>DJ30: jump height / contact time; hands on hips)<br>G1: 1.35 ± 0.22 ; 1.67 ± 0.34<br>G2: 1.51 ± 0.49 ; 1.68 ± 0.58<br>C: 1.26 ± 0.14 ; 1.31 ± 0.13                            |
| Salonikidis and Zafeiridis 2008 [51] |  | 64<br>G1: 16<br>G2: 16<br>G3: 16<br>C: 16 | ALL: 21.1 ± 1.3                                   | Tennis                                                                                                                                                                                                                                           | Intervention 1<br>Duration: 9 weeks<br>Type: Plyometric training<br>Frequency: 3x week<br>Intervention 2<br>Duration: 9 weeks<br>Type: Tennis-drills training<br>Frequency: 3x week<br>Intervention 3                |     | Maintained training routines                           | AMD Co. Ltd., LC 4204-K600 (1-D, Saitawa, Japan)              | Load cell (DJ20: jump height / contact time; hands on hips)<br>G1: 125.3 ± 45.2 ; 150.0 ± 46.9<br>G2: 122.0 ± 25.0 ; 133.4 ± 27.1<br>G3: 128.8 ± 42.5 ; 153.7 ± 44.1<br>C: 130.8 ± 18.2 ; 124.2 ± 29.0 |

|                                  |                 |                                             |                                                                                                               |  |  |                              |                                |                                                               |                                                                                                      |
|----------------------------------|-----------------|---------------------------------------------|---------------------------------------------------------------------------------------------------------------|--|--|------------------------------|--------------------------------|---------------------------------------------------------------|------------------------------------------------------------------------------------------------------|
|                                  |                 |                                             | Duration: 9 weeks<br>Type: Combined training<br>Frequency: 3x week                                            |  |  |                              |                                |                                                               |                                                                                                      |
| Spinks <i>et al</i> 2007<br>[52] |                 |                                             | Intervention 1<br>Duration: 8 weeks<br>Type: Sprint training + resisted sprint training<br>Frequency: 2x week |  |  | Maintained training routines | Onspot (Wollongong, Australia) | Force plate (DJ50: jump height / contact time; hands on hips) | G1: 117.2 ± 27.1 ; 137.3 ± 27.7<br>G2: 112.2 ± 18.9 ; 121.8 ± 21.3<br>C: 127.2 ± 36.2 ; 128.7 ± 25.1 |
| 30<br>G1: 10<br>G2: 10<br>C: 10  | ALL: 21.8 ± 4.2 | Soccer, rugby union and Australian football | Intervention 2<br>Duration: 8 weeks<br>Type: Nonresisted sprint training<br>Frequency: 2x week                |  |  |                              |                                |                                                               |                                                                                                      |
| Young <i>et al</i> 1999<br>[53]  |                 |                                             | Intervention 1<br>Duration: 6 weeks<br>Type: DJ for height<br>Frequency: 3x week                              |  |  | Maintained training routines | ?                              | Contact mat (DJ30: jump height / contact time; hands on hips) | G1: 180 ± 26 ; 182 ± 37<br>G2: 203 ± 50 ; 234 ± 32<br>C: 210 ± 45 ; 201 ± 65                         |
| 25<br>G1: 11<br>G2: 5<br>C: 9    | ALL: 19-34      | Track and field, basketball and soccer      | Intervention 2<br>Duration: 6 weeks<br>Type: DJ for height and minimum contact time<br>Frequency: 3x week     |  |  |                              |                                |                                                               |                                                                                                      |

C = control, CMJ = countermovement jump, DJ = drop jump, G = group, N = number, ? = unknown, \* = obtained from authors.

**Table S2.** Non-randomized studies.

| Author, year                                                         | N  | Age        | Sport         | Intervention                                                                               | Control                      | Measurement Equipment                | Methodology                                                          | Results                                                                                                                          |
|----------------------------------------------------------------------|----|------------|---------------|--------------------------------------------------------------------------------------------|------------------------------|--------------------------------------|----------------------------------------------------------------------|----------------------------------------------------------------------------------------------------------------------------------|
| Dobbs <i>et al</i> 2020 [55]                                         | 39 | ALL: 9-17  | ?             | Duration: 12 weeks<br>Type: Neuromuscular training<br>Frequency: 2x/week strength training | Maintained training routines | AMTI OR6-5 (Watertown, MA, USA)      | Force plate (CMJ: jump height / time to takeoff; hands on hips)      | G1: 0.23 ± 0.09 ; 0.27 ± 0.09<br>G2: 0.32 ± 0.08 ; 0.41 ± 0.07<br>C1: 0.24 ± 0.04 ; 0.21 ± 0.05<br>C2: 0.35 ± 0.15 ; 0.34 ± 0.12 |
| Pre-PHV G1: 14<br>Post-PHV G2: 7<br>Pre-PHV C1: 10<br>Post-PHV C2: 7 |    |            |               |                                                                                            |                              |                                      |                                                                      |                                                                                                                                  |
| Chaabene <i>et al</i> 2019 [57]                                      | 15 | 13.2 ± 1.3 | Weightlifting | Duration: 5 months<br>Type: Weightlifting season<br>Frequency: ?                           | N/A                          | Optojump (Microgate, Bolzano, Italy) | Photoelectric system (DJ: jump height / contact time; hands on hips) | 1.0 ± 0.2 ; 1.0 ± 0.2                                                                                                            |

|                                |                                |                                                   |                  |                                                                                                                                                                                                                                                                                             |                                                                                                                                   |                                              |                                                               |                                                                                                           |
|--------------------------------|--------------------------------|---------------------------------------------------|------------------|---------------------------------------------------------------------------------------------------------------------------------------------------------------------------------------------------------------------------------------------------------------------------------------------|-----------------------------------------------------------------------------------------------------------------------------------|----------------------------------------------|---------------------------------------------------------------|-----------------------------------------------------------------------------------------------------------|
| Li <i>et al</i> 2019<br>[56]   | 28<br>G1: 10<br>G2: 19<br>C: 9 | G1: 20.2 ± 1.0<br>G2: 21.2 ± 1.5<br>C: 20.8 ± 1.2 | Distance running | Intervention 1<br>Duration: 8 weeks<br>Type: Complex training (afternoon) + endurance training (morning)<br>Frequency: 3x/week + 6x/week<br>Intervention 2<br>Duration: 8 weeks<br>Type: Heavy strength training (afternoon) + endurance training (morning)<br>Frequency: 3x/week + 6x/week | Duration: 8 weeks<br>Type: Strength endurance training (afternoon) + endurance training (morning)<br>Frequency: 3x/week + 6x/week | Kistler Quattro Jump, Winterhur, Switzerland | Force Plate (DJ50: jump height / contact time; hands on hips) | G1: 59.05 ± 11.63 ; 70.80 ± 15.69<br>G2: 61.57 ± 12.95 ; 66.71 ± 8.53<br>C: 62.11 ± 12.04 ; 62.91 ± 12.07 |
| Wee <i>et al</i> 2019<br>[42]  | 18<br>G1: 9<br>C: 9            | ALL: 20.0 ± 1.0                                   | Badminton        | Duration: 4 weeks<br>Type: Badminton specific training<br>Frequency: 2x/week                                                                                                                                                                                                                | Maintained training routines                                                                                                      | Bertec FP4060-10-4000                        | Force plate (DJ30: jump height / contact time; hands on hips) | G1: 1.16 ± 0.39 ; 1.32 ± 0.42<br>C: 1.06 ± 0.14 ; 1.11 ± 0.40                                             |
| Keiner <i>et al</i> 2018 [36]  | 114<br>G1: 62<br>C: 52         | ALL: 13-19                                        | Soccer           | Duration: 2 years<br>Type: Strength training<br>Frequency: 2x/week                                                                                                                                                                                                                          | Maintained training routines                                                                                                      | Refitronic, Schmitten, Germany               | Contact mat (DJ24: jump height / contact time; hands on hips) | ?                                                                                                         |
| Beattie <i>et al</i> 2017 [54] | 20<br>G1: 11<br>C: 9           | G1: 27.4 ± 7.2<br>C: 29.5 ± 10.0                  | Distance running | Duration: 40 weeks<br>Type: Endurance training and strength training<br>Frequency: 2x/week                                                                                                                                                                                                  | Maintained training routines                                                                                                      | AMTI OR6-5 (Watertown, MA, USA)              | Force plate (DJ30: jump height / contact time; hands on hips) | G1: 1.10 ± 0.28 ; 1.26 ± 0.33<br>C: 1.28 ± 0.31 ; 1.16 ± 0.12                                             |

C = control, CMJ = countermovement jump, DJ = drop jump, G = group, N = number, ? = unknown.

## Supplemental Material S5. Meta-analyses of all study designs.

a)

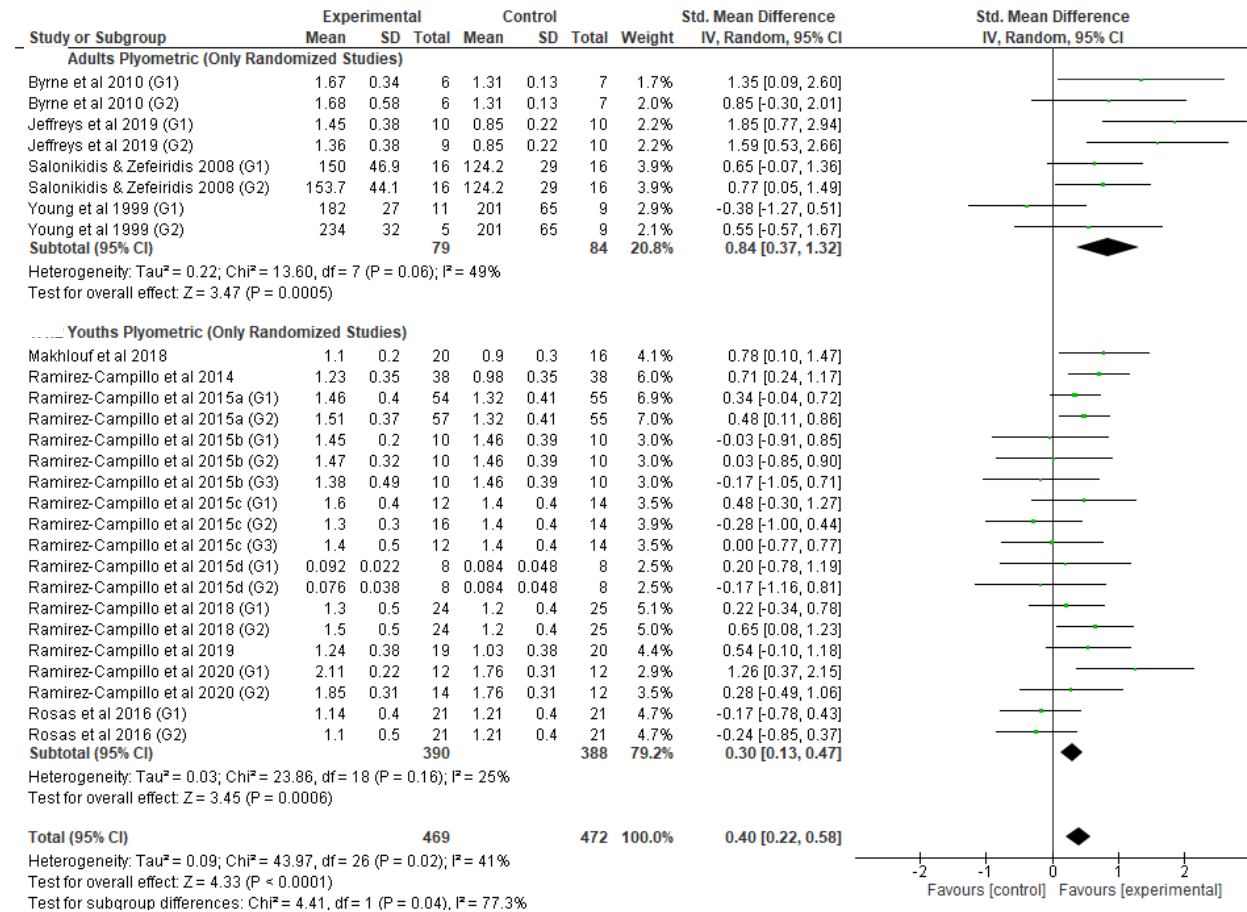

b)

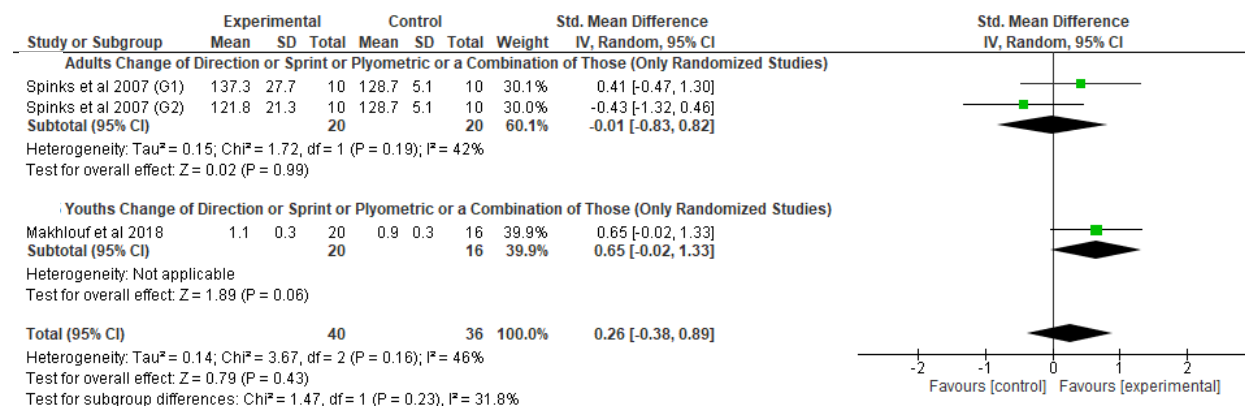

c)

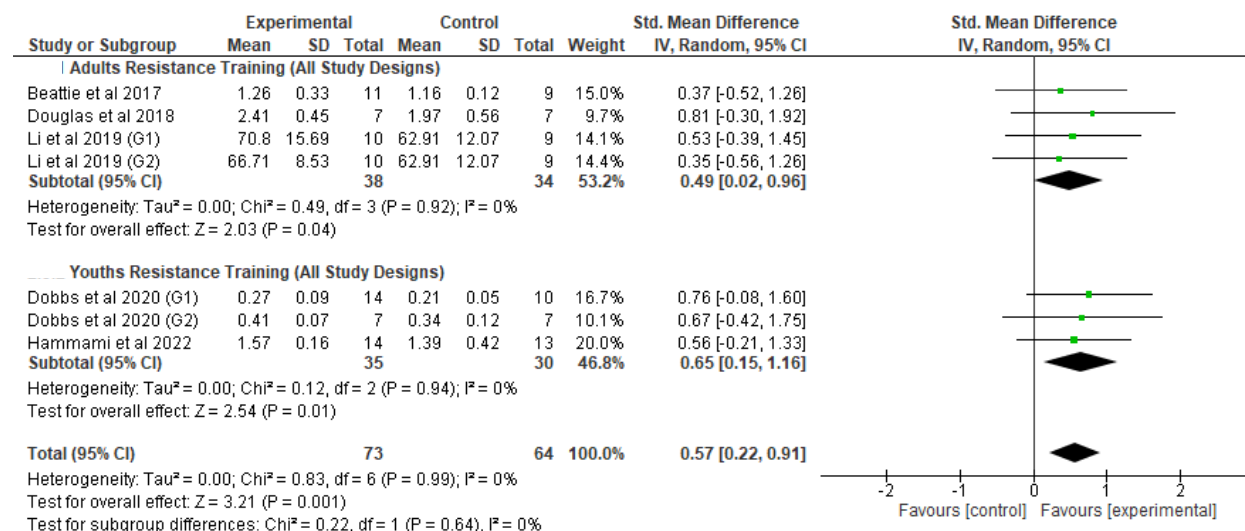

**Figure S1.** Forest plot of the overall standardized mean difference [95% CI] for each study (randomized and non-randomized) with control group (the size of the green dot corresponds to the weight of the study within the meta-analysis) with (a) a plyometric training intervention, (b) a combination of change of direction, sprint, or plyometric training intervention and (c) a resistance training intervention included in the meta-analysis.

a)

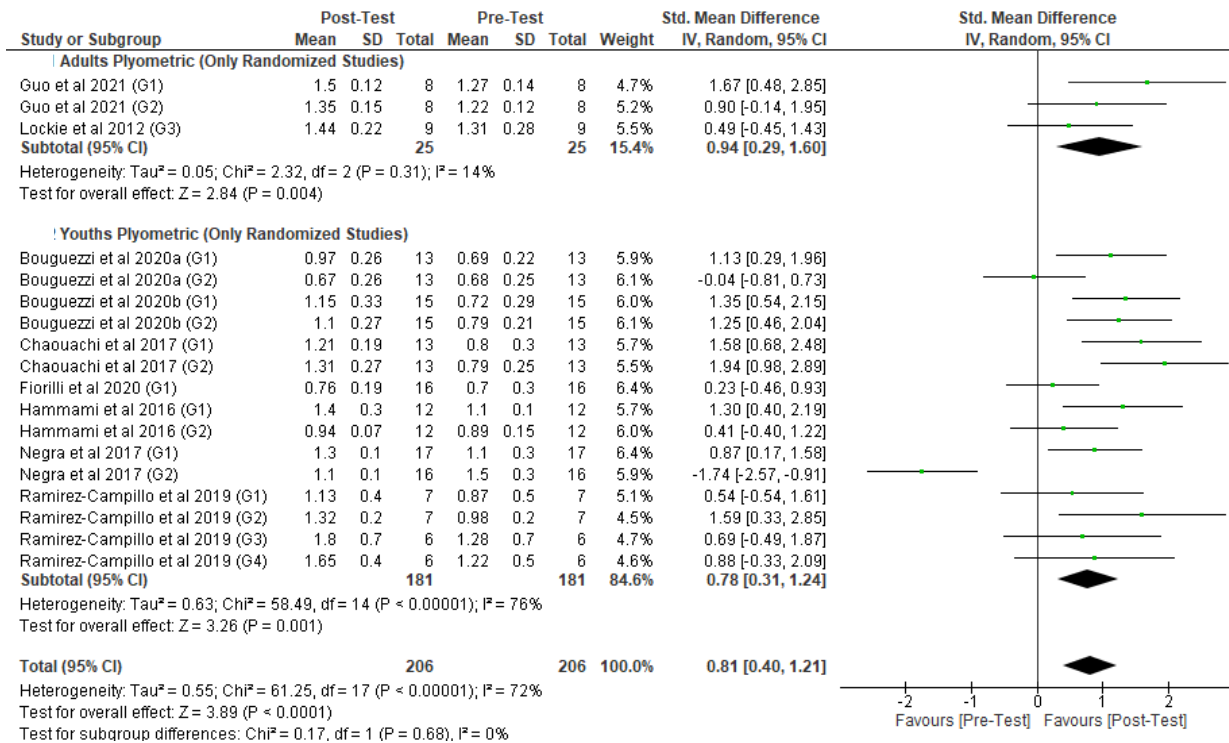

b)

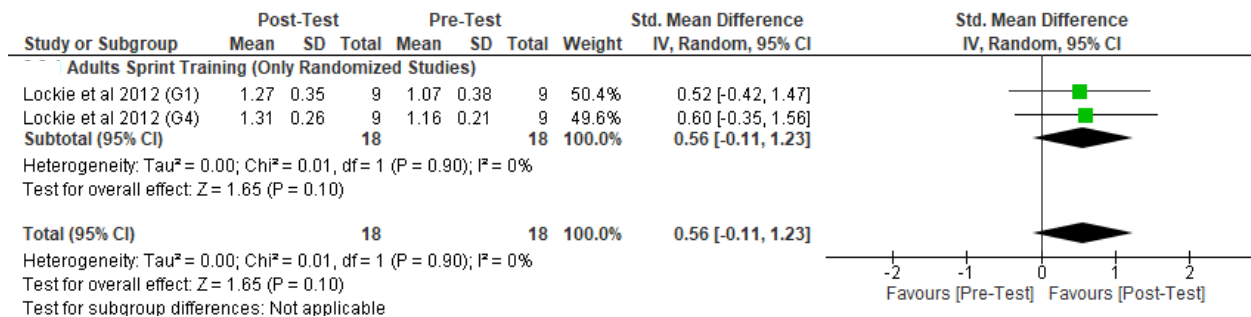

c)

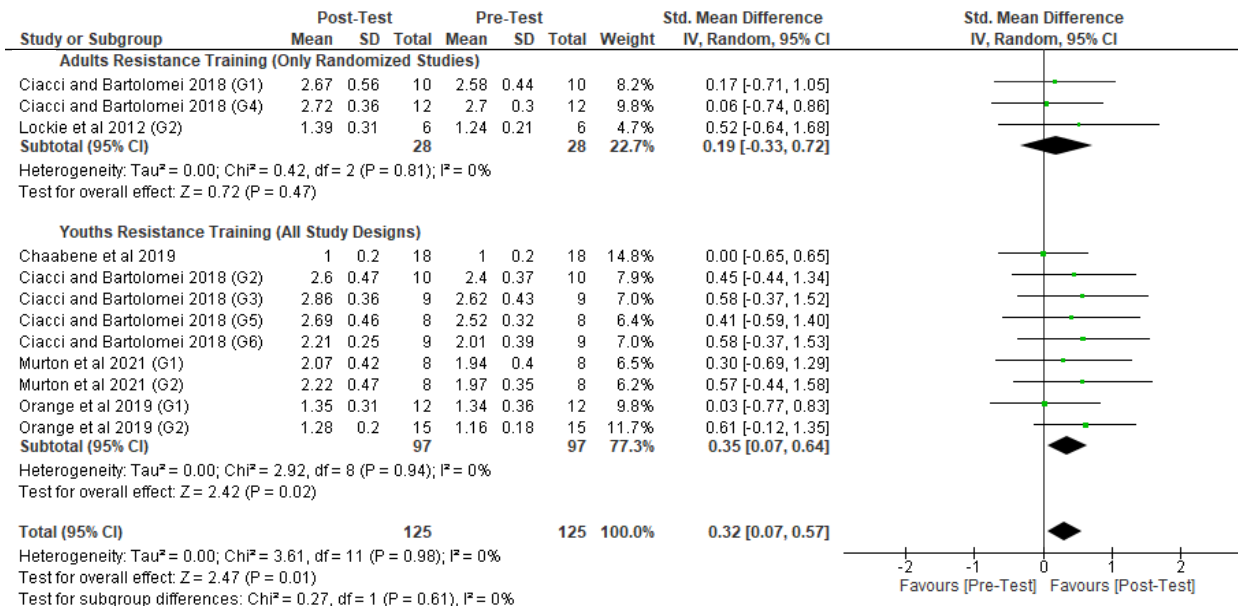

**Figure S2.** Forest plot of the overall standardized mean difference [95% CI] for each study (randomized and non-randomized) without control group (the size of the green dot corresponds to the weight of the study within the meta-analysis) with (a) a plyometric training intervention, (b) a sprint training intervention and (c) a resistance training intervention.
